# Supplementary material for: Citrus aurantium L. Dry Extracts Ameliorate Adipocyte Differentiation of 3T3-L1 Cells Exposed to TNFα by Down-Regulating miR-155 Expression
Source: Nutrients. 2020 May 28;12(6):1587. doi: 10.3390/nu12061587 (PMC7352926; doi:10.3390/nu12061587)
Supplement: Supplementary file 1 [file nutrients-12-01587-s001.zip]

Archive with 5 entries (5 files):
- Figure S legends.pdf
- Figure S1.pdf
- Figure S2.pdf
- Figure S3.pdf
- Figure S4.pdf
