# Supplementary figures and images for: Citrus aurantium L. Dry Extracts Ameliorate Adipocyte Differentiation of 3T3-L1 Cells Exposed to TNFα by Down-Regulating miR-155 Expression
Source: MDPI journal article supplement (doi:10.3390/nu12061587), 2020-05-28

**a**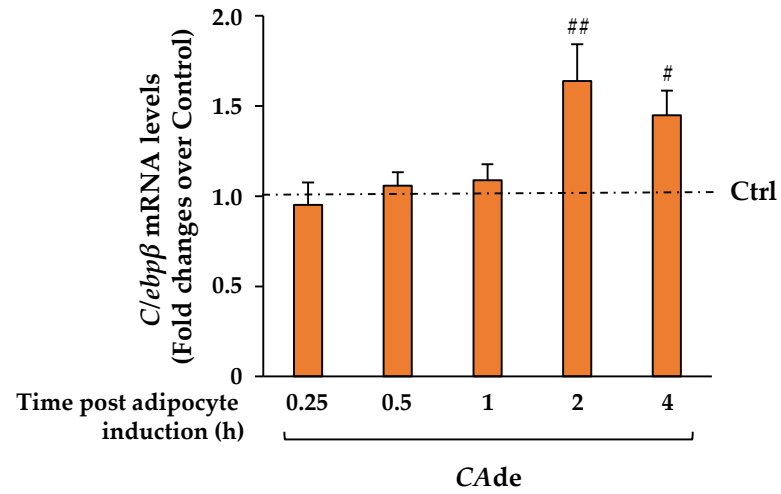**b**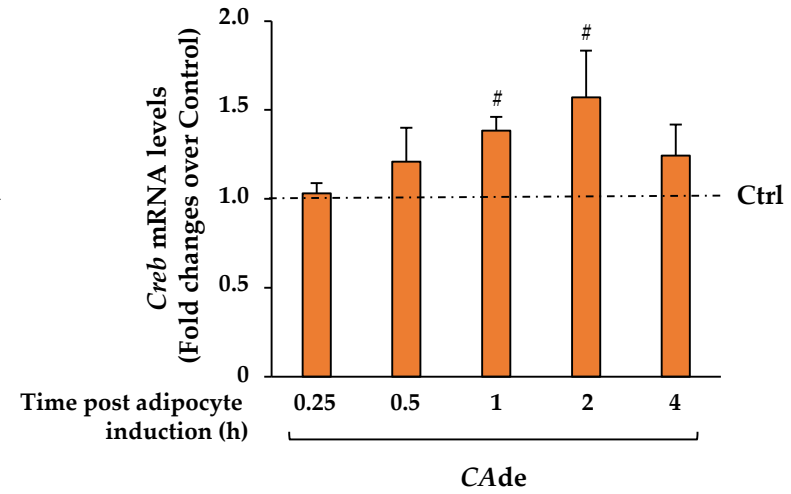**Figure S2**

Supplement: s1 [file s1]

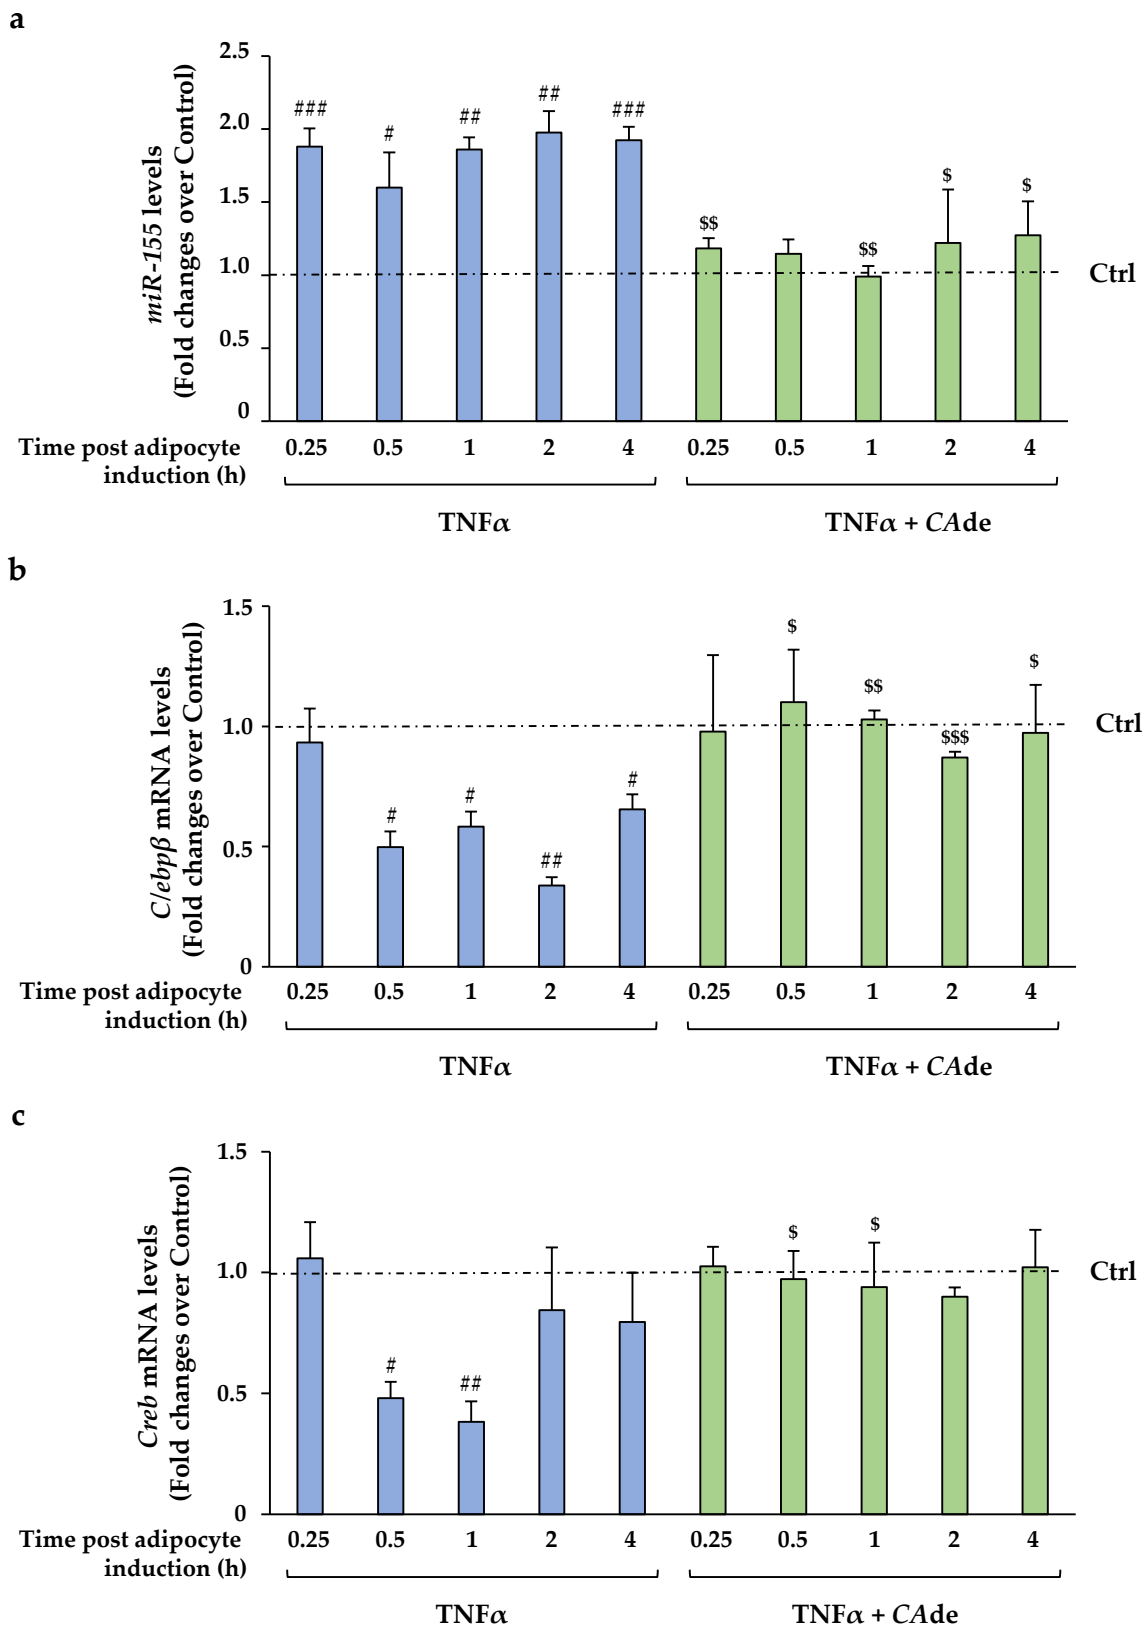

Figure S4

Supplement: s1 [file s1]

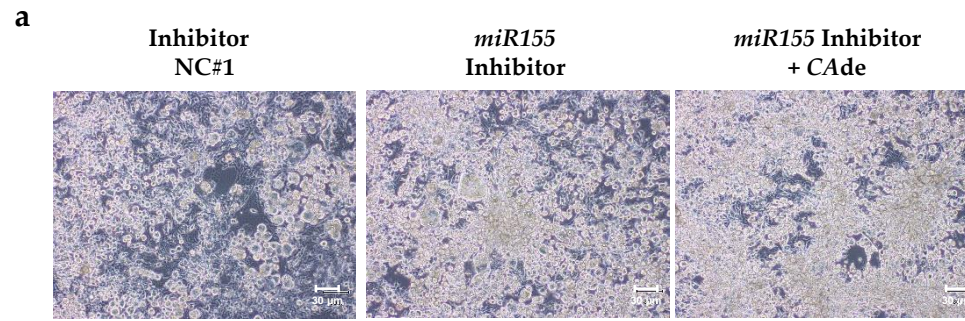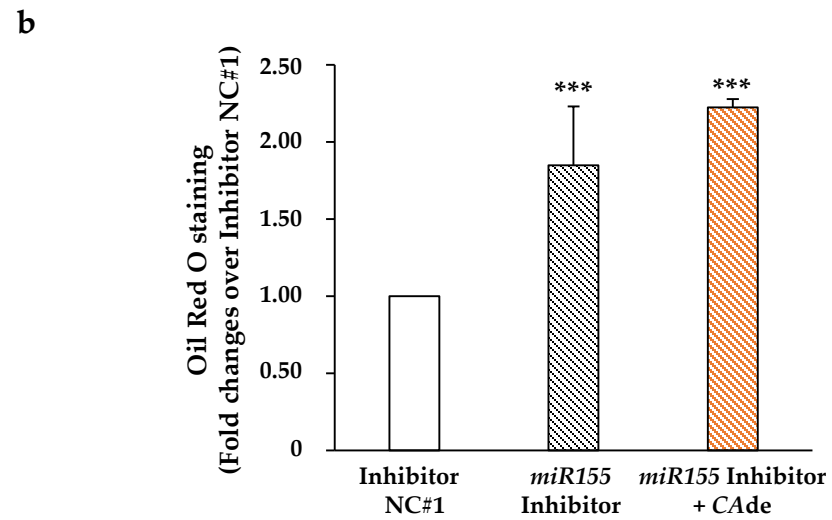

**Figure S3**

Supplement: s1 [file s1]

**a**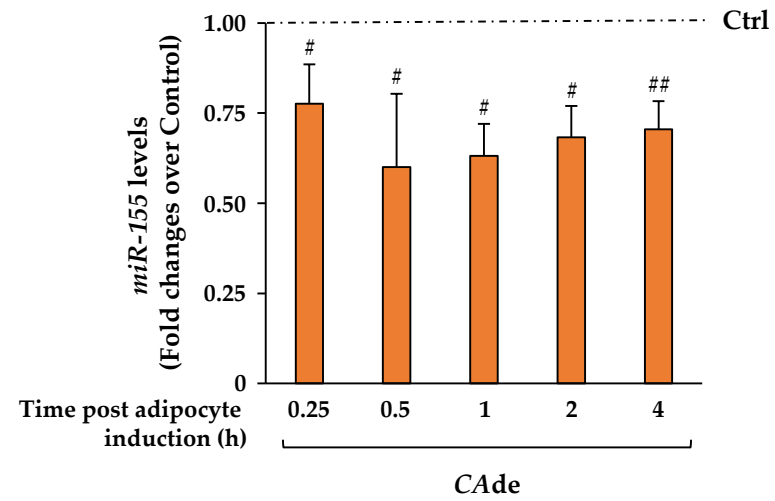**b**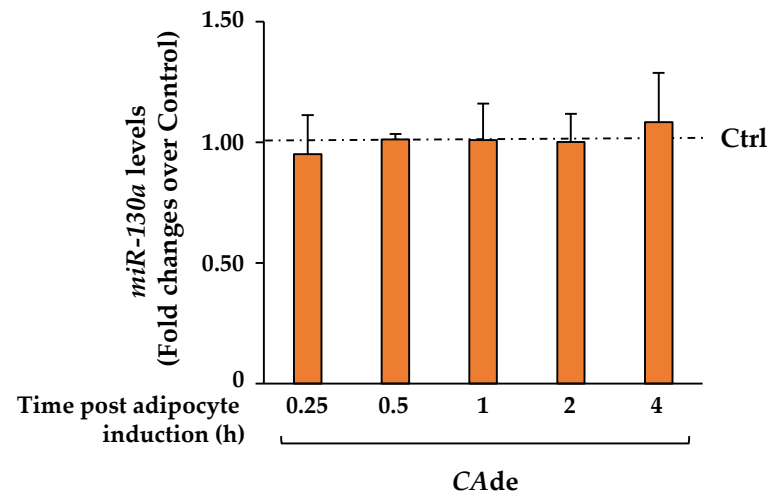**c**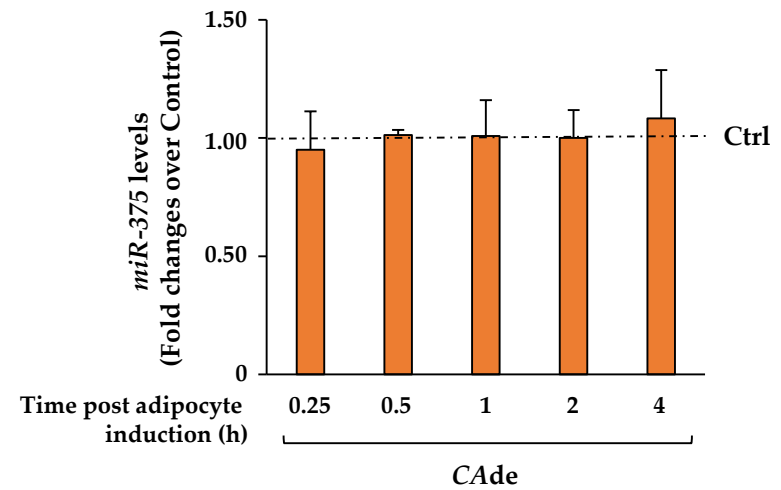**Figure S1**

Supplement: s1 [file s1]
